# Supplementary material
Source: PubMed Central journal article supplement (PMC3097307)
Supplement: NIHMS275649-supplement-Supplemental.pdf [file NIHMS275649-supplement-Supplemental.pdf]

## **SUPPLEMENTAL MATERIAL**

### **Physical Activity and the Risk of Incident Atrial Fibrillation in Women**

Brendan M. Everett, MD, MPH, David Conen, MD, MPH, Julie E. Buring, ScD,

MV Moorthy, PhD, I-Min Lee, MBBS, ScD, and Christine Albert, MD, MPH

**Supplementary Table 1.** Risk of incident atrial fibrillation according to level of physical activity with censoring for incident cardiovascular disease.

|                               | Quintile of Cumulative Average Weekly Physical Activity Level |                  |                  |                  |                  | P-trend |
|-------------------------------|---------------------------------------------------------------|------------------|------------------|------------------|------------------|---------|
|                               | 1                                                             | 2                | 3                | 4                | 5                |         |
| Model 1 Hazard Ratio (95% CI) | 1.0                                                           | 1.04 (0.85-1.28) | 0.87 (0.70-1.07) | 0.88 (0.71-1.09) | 0.80 (0.64-1.00) | 0.008   |
| P-value                       |                                                               | 0.17             | 0.19             | 0.23             | 0.046            |         |
| Model 2 Hazard Ratio (95% CI) | 1.0                                                           | 1.06 (0.86-1.30) | 0.89 (0.72-1.10) | 0.91 (0.74-1.13) | 0.85 (0.68-1.05) | 0.03    |
| P-value                       |                                                               | 0.59             | 0.28             | 0.39             | 0.13             |         |
| Model 3 Hazard Ratio (95% CI) | 1.0                                                           | 1.12 (0.91-1.38) | 0.97 (0.78-1.20) | 1.01 (0.82-1.26) | 0.96 (0.77-1.21) | 0.21    |
| P-value                       |                                                               | 0.27             | 0.78             | 0.91             | 0.75             |         |
| Model 4 Hazard Ratio (95% CI) | 1.0                                                           | 1.12 (0.91-1.38) | 0.97 (0.78-1.21) | 1.02 (0.82-1.26) | 0.98 (0.78-1.22) | 0.26    |
| P-value                       |                                                               | 0.27             | 0.80             | 0.86             | 0.85             |         |

Model 1: Age, randomized treatment, cholesterol, current smoking, past smoking, alcohol, diabetes, and race adjusted

Model 2: Model 1 plus hypertension

Model 3: Model 1 plus body mass index (kg/m<sup>2</sup>)

Model 4: Model 1 plus hypertension and body mass index

Abbreviations: AF, atrial fibrillation; CI, confidence interval; MET, metabolic equivalent task.

**Supplementary Table 2.** Risk of incident atrial fibrillation according to the United States government’s recommended level of weekly physical activity with censoring for incident cardiovascular disease.

|                               | Cumulative Average Physical Activity Level<br>(MET-hours/week) |                  | P    |
|-------------------------------|----------------------------------------------------------------|------------------|------|
|                               | <7.5                                                           | 7.5+             |      |
| Incident CVD Censored         |                                                                |                  |      |
| Model 1 Hazard Ratio (95% CI) | 1.0                                                            | 0.86 (0.74-0.98) | 0.03 |
| Model 2 Hazard Ratio (95% CI) | 1.0                                                            | 0.88 (0.77-1.01) | 0.08 |
| Model 3 Hazard Ratio (95% CI) | 1.0                                                            | 0.95 (0.83-1.10) | 0.50 |
| Model 4 Hazard Ratio (95% CI) | 1.0                                                            | 0.96 (0.83-1.11) | 0.57 |

Model 1: Age, randomized treatment, cholesterol, current smoking, past smoking, alcohol, diabetes, and race adjusted

Model 2: Model 1 plus hypertension

Model 3: Model 1 plus body mass index (kg/m<sup>2</sup>)

Model 4: Model 1 plus hypertension and body mass index

Abbreviations: AF, atrial fibrillation; CI, confidence interval; CVD, cardiovascular disease; MET, metabolic equivalent task.
